# Supplementary material for: Single crystal fluorescence behavior of a new HOF material: a potential candidate for a new LED
Source: Royal Society of Chemistry journal article supplement (doi:10.1039/c8tc01808a), 2018-01-01
Supplement: c8tc01808a1.pdf [file c8tc01808a1.pdf]

# Supporting Information

## Single Crystal Fluorescence Behavior of a New HOF Material: Potential Candidate for a New LED

Eduardo Gomez,<sup>†</sup> Mario Gutiérrez,<sup>†</sup> Boiko Cohen,<sup>†</sup> Ichiro Hisaki,<sup>§\*</sup> and  
Abderrazzak Douhal<sup>†\*</sup>

<sup>†</sup>Departamento de Química Física, Facultad de Ciencias Ambientales y Bioquímica, and  
INAMOL, Universidad de Castilla-La Mancha, Avenida Carlos III, S.N., 45071 Toledo, Spain.

<sup>§</sup> Department of Material and Life Science, Graduate School of Engineering, Osaka University,  
2-1 Yamadaoka, Suita, Osaka 565-0871, Japan.

\*Corresponding author: E-mail address: [abderrazzak.douhal@uclm.es](mailto:abderrazzak.douhal@uclm.es)

E-mail address: [hisaki@mls.eng.osaka-u.ac.jp](mailto:hisaki@mls.eng.osaka-u.ac.jp)

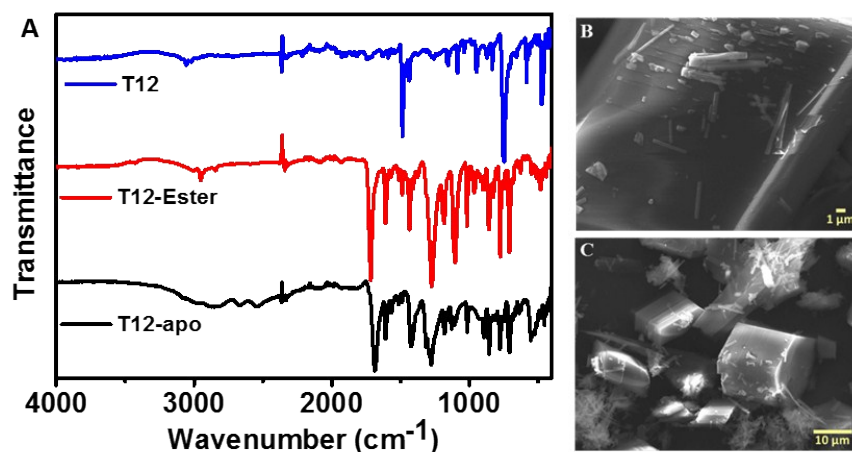

**Figure S1.** (A) Infrared spectra of T12, T12-ester and T12-apo in solid state. (B) and (C) SEM images of T12-apo in solid state.

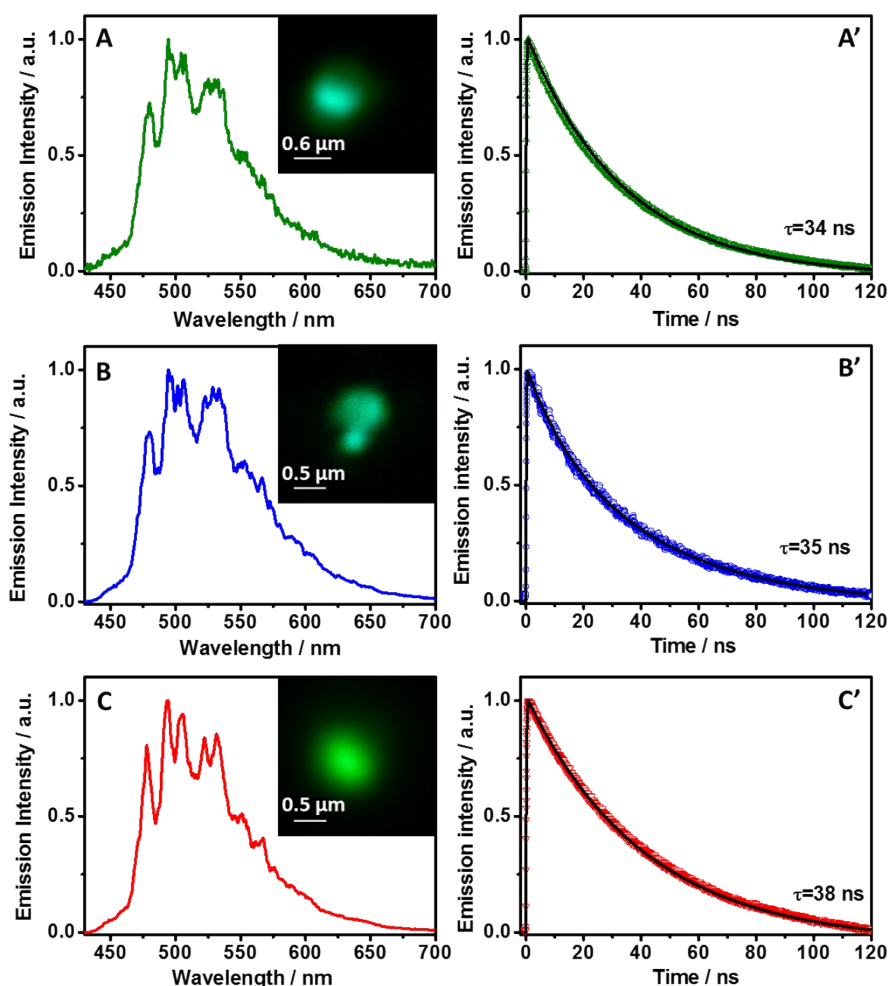

**Figure S2.** Emission (A-C) spectra and decays (A'-C') of small crystals of T12. The excitation wavelength was 390 nm, and the decays were recorded over the whole spectral range using a 430 nm long-pass filter. The solid lines are from the best-fit using a monoexponential function. The insets in (A-C) show the FLIM images of the crystals.

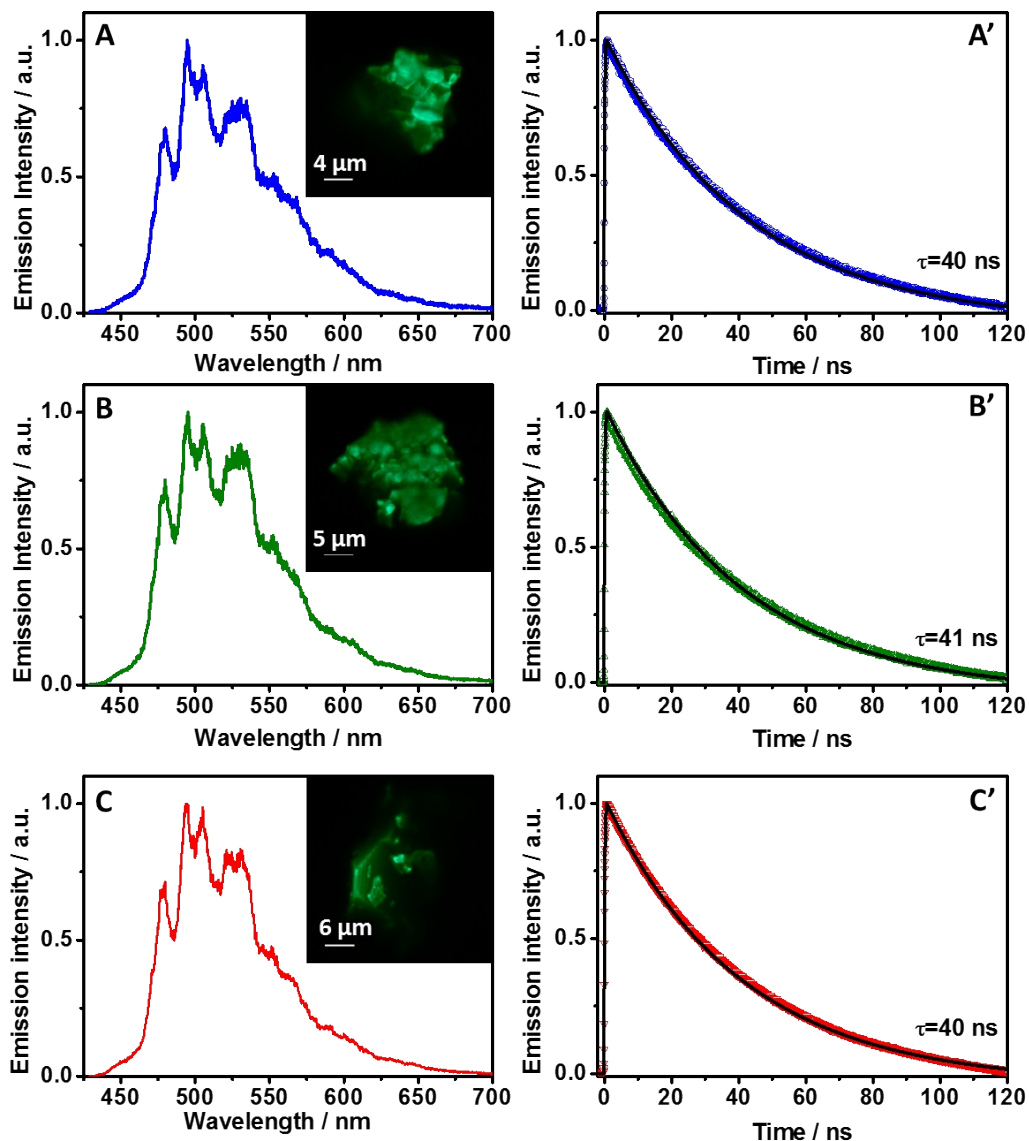

**Figure S3.** Emission (A-C) spectra and decays (A'-C') of large crystals of T12. The excitation wavelength was 390 nm, and the decays were recorded over the whole spectral range using a 430 nm long-pass filter. The solid lines are from the best-fit using a monoexponential function. The insets in (A-C) show the FLIM images of the crystals.

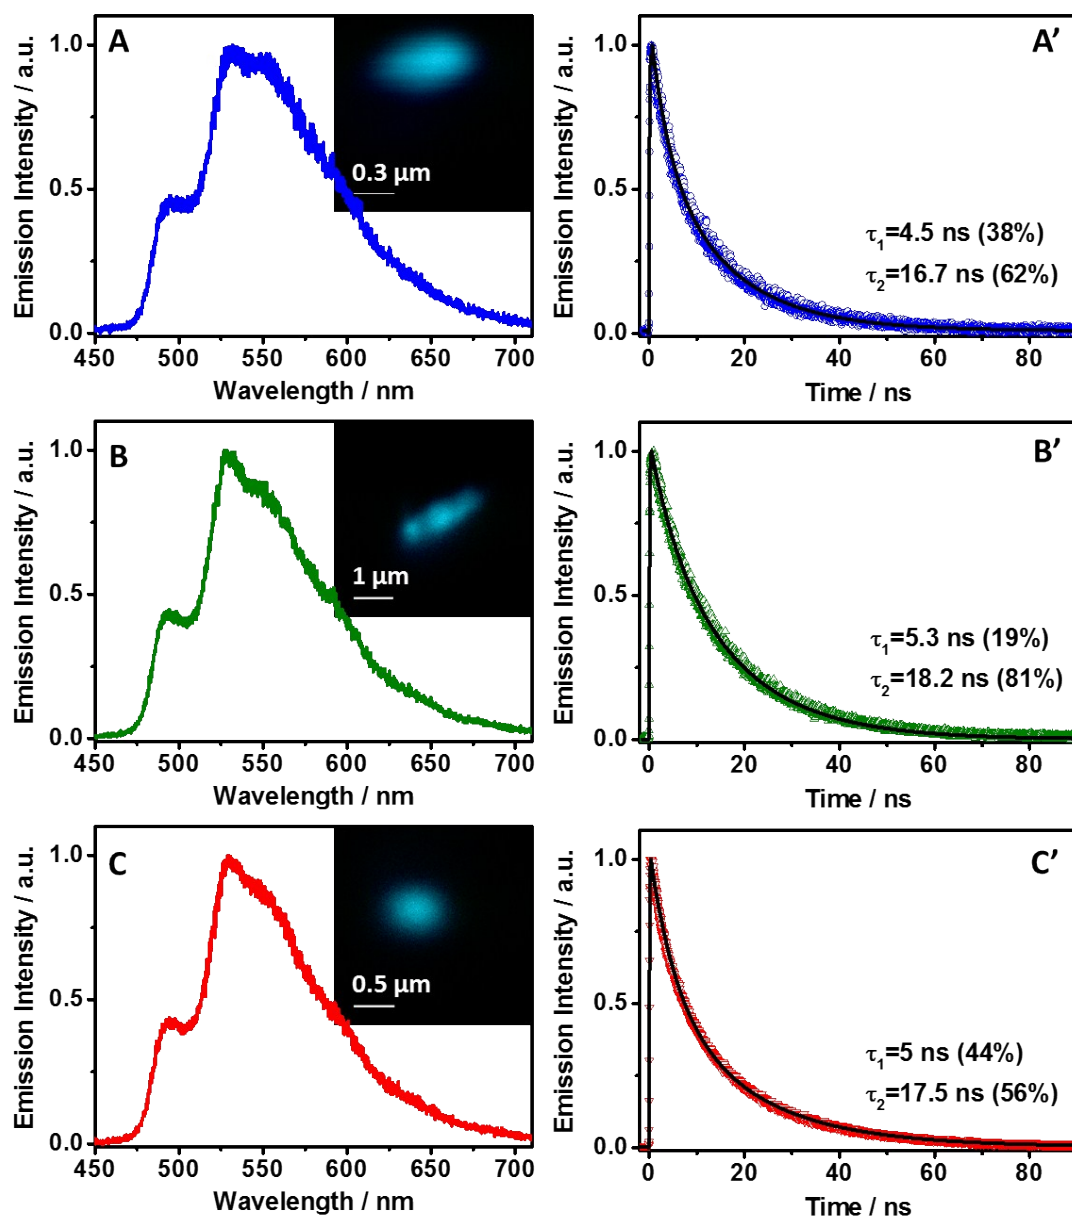

**Figure S4.** Emission (A-C) spectra and decays (A'-C') of small crystals of T12-Ester. The excitation wavelength was 390 nm, and the decays were recorded over the whole spectral range using a 430 nm long-pass filter. The solid lines are from the best-fit using a monoexponential function. The insets in (A-C) show the FLIM images of the crystals.

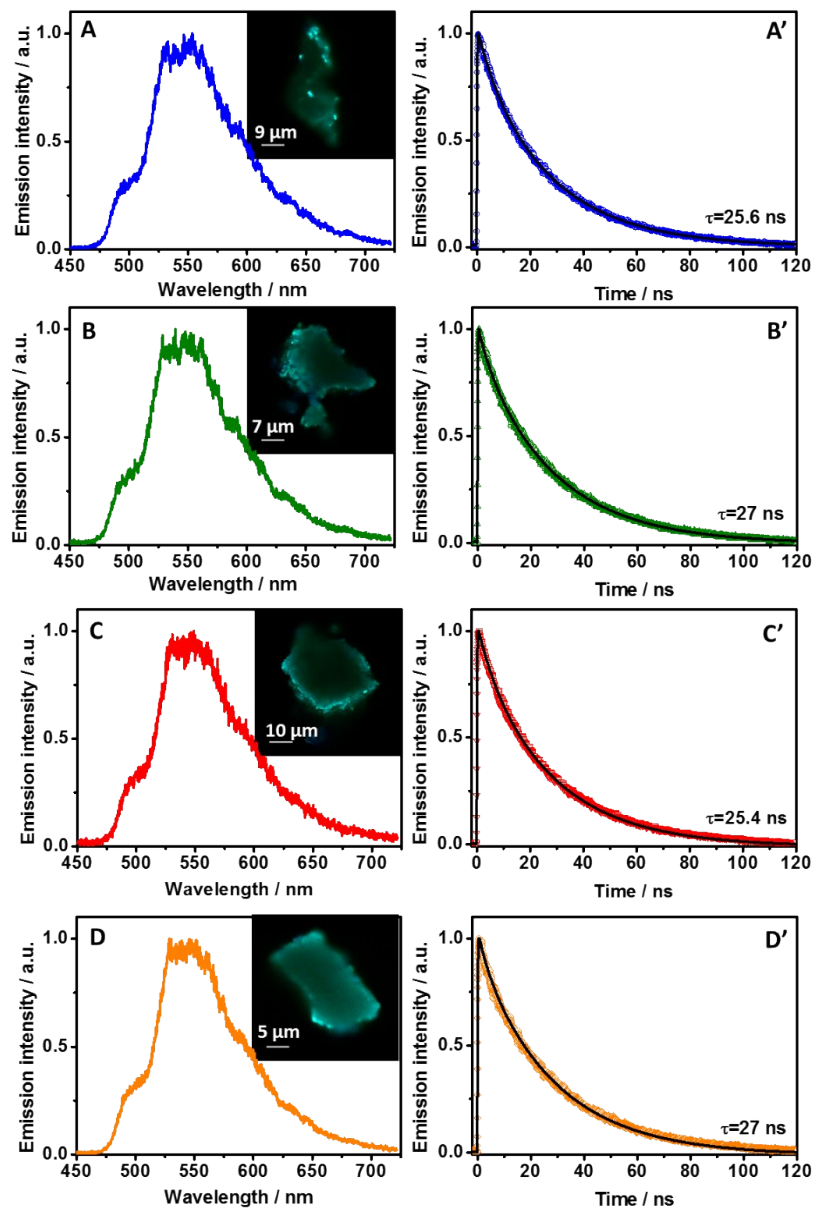

**Figure S5.** Emission (A-D) spectra and decays (A'-D') of large crystals of T12-Ester. The excitation wavelength was 390 nm, and the decays were recorded over the whole spectral range using a 430 nm long-pass filter. The solid lines are from the best-fit using a monoexponential function. The insets in (A-D) show the FLIM images of the crystals.

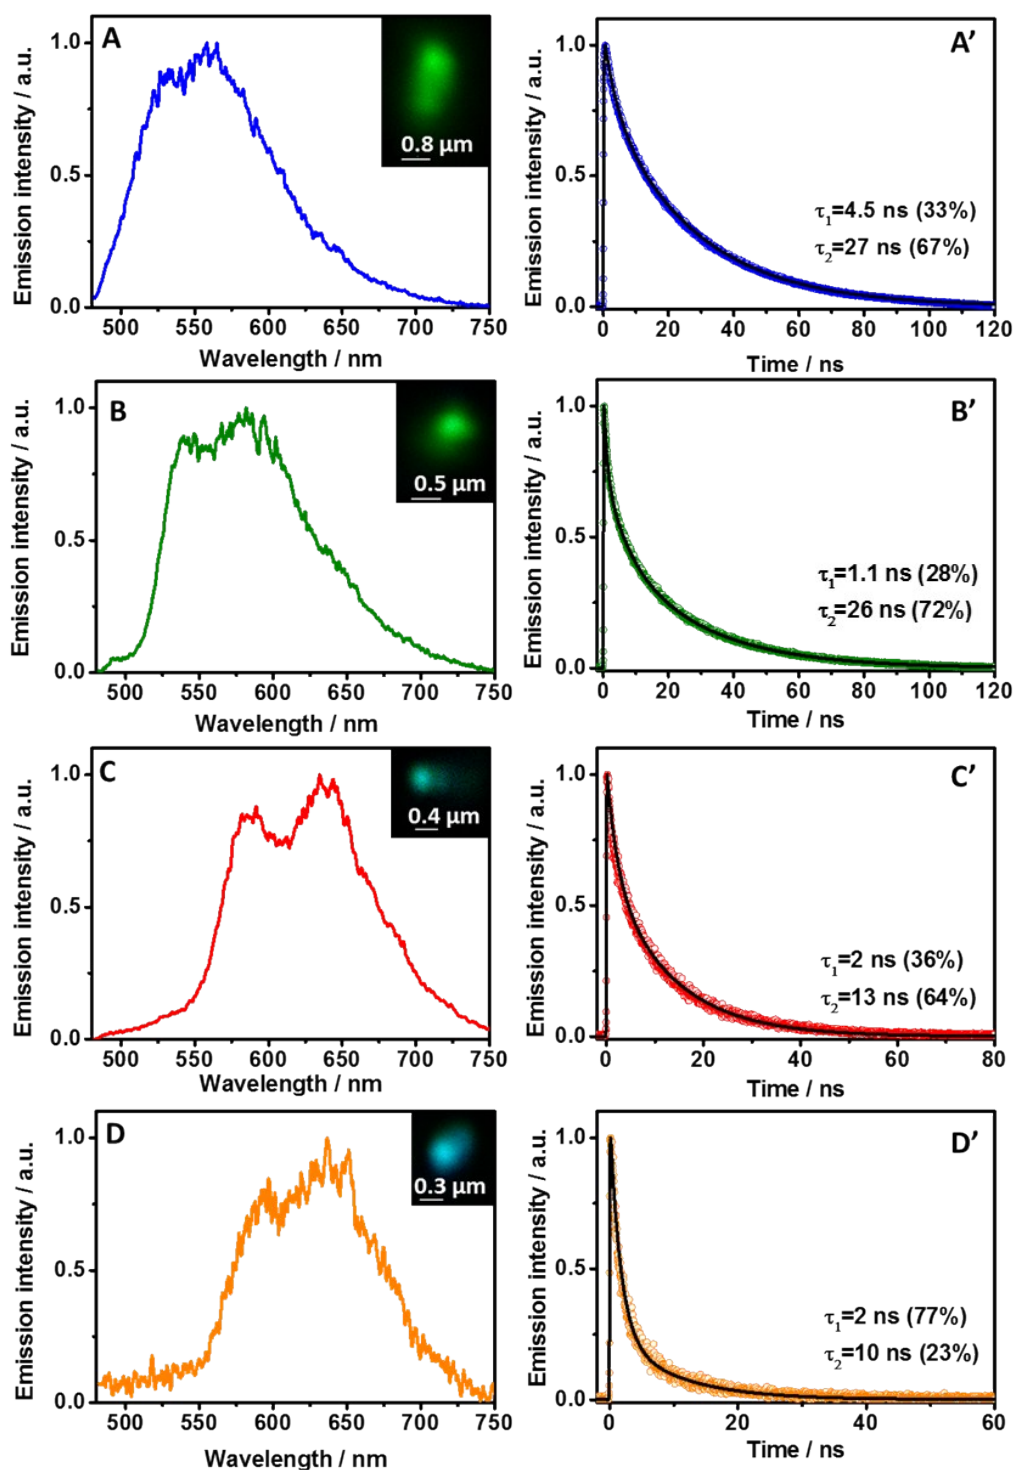

**Figure S6.** Emission (A-D) spectra and decays (A'-D') of small crystals of T12-apo. The excitation wavelength was 390 nm, and the decays were recorded over the whole spectral range using a 430 nm long-pass filter. The solid lines are from the best-fit using a monoexponential function. The insets in (A-D) show the FLIM images of the crystals.

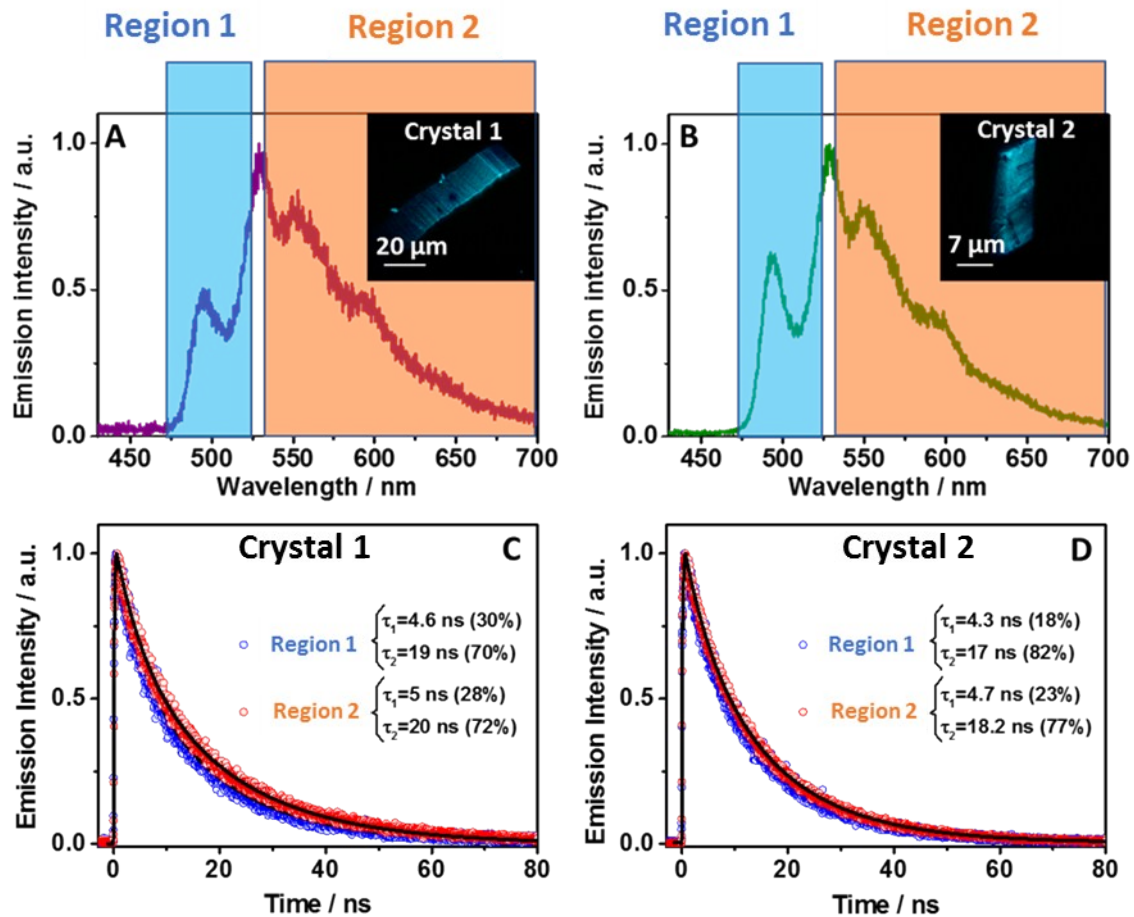

**Figure S7.** Emission (A-B) spectra and (C-D) decays of large crystals of T12-apo. The excitation wavelength was 390 nm and the decays are measured at selected spectral range using two different filters. For region 1, we used a FF01-503/40 Chroma filter, and for region 2 we used a 530 nm long-pass filter (HQ530LP, Chroma). The solid lines are from the best-fit using a multiexponential function. The insets of (A) and (B) show the FLIM images of the large crystals.

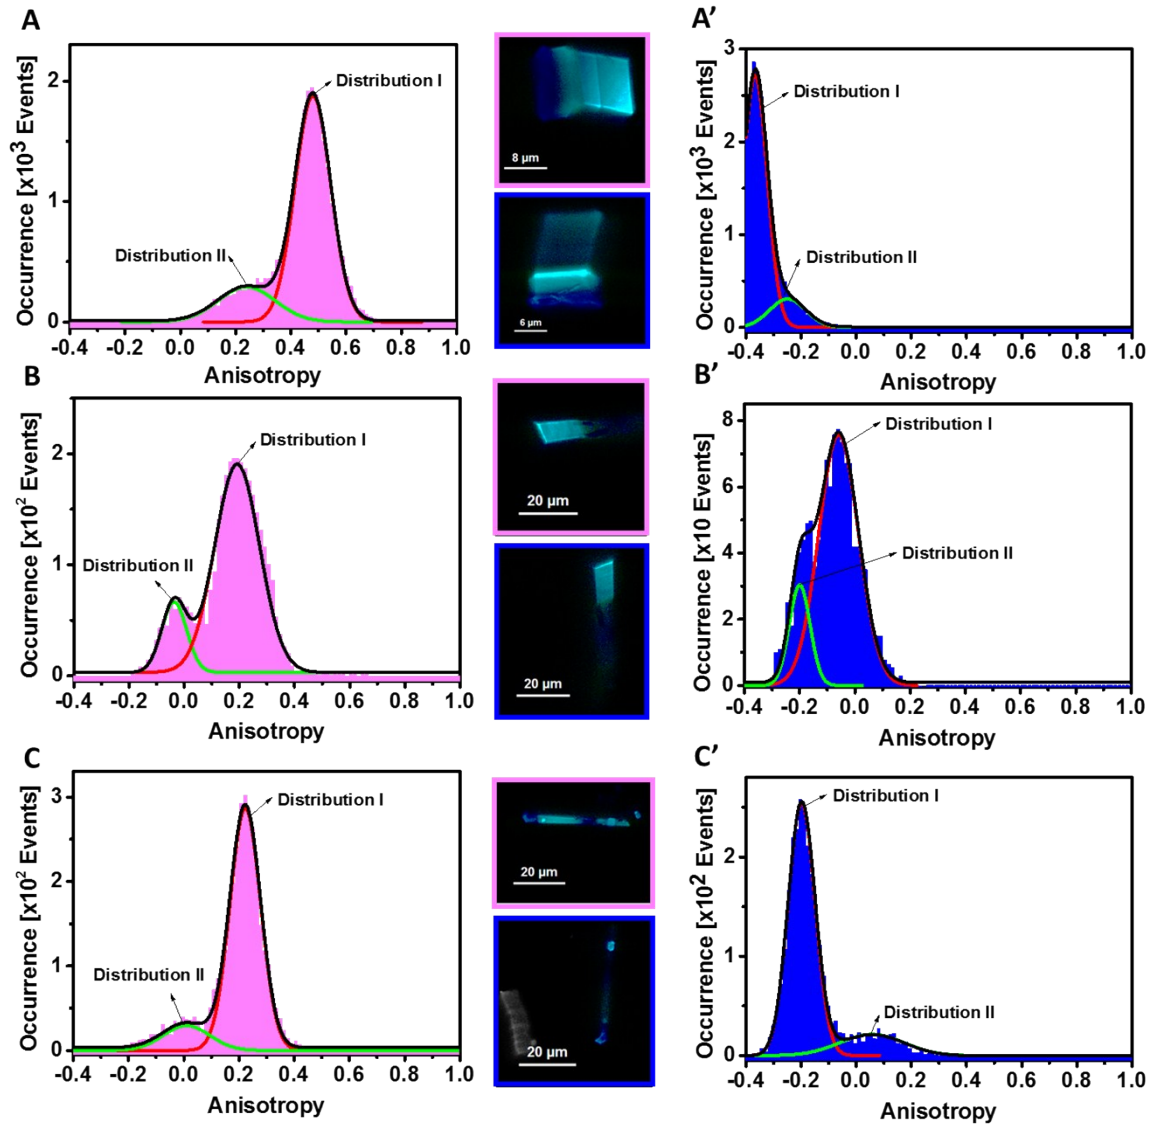

**Figure S8.** Histograms of the emission anisotropy for (A-C) 1 and (A'-C') 2 positions of T12-apo crystal. The solids lines are from the Gaussian distribution fits, showing two different populations of the emitters. The related data are given in table S1. The images show the 1 and 2 positions of the crystals. The excitation wavelength was 390 nm and the anisotropy was measured over the whole spectral range using a 430 nm long-pass filter.



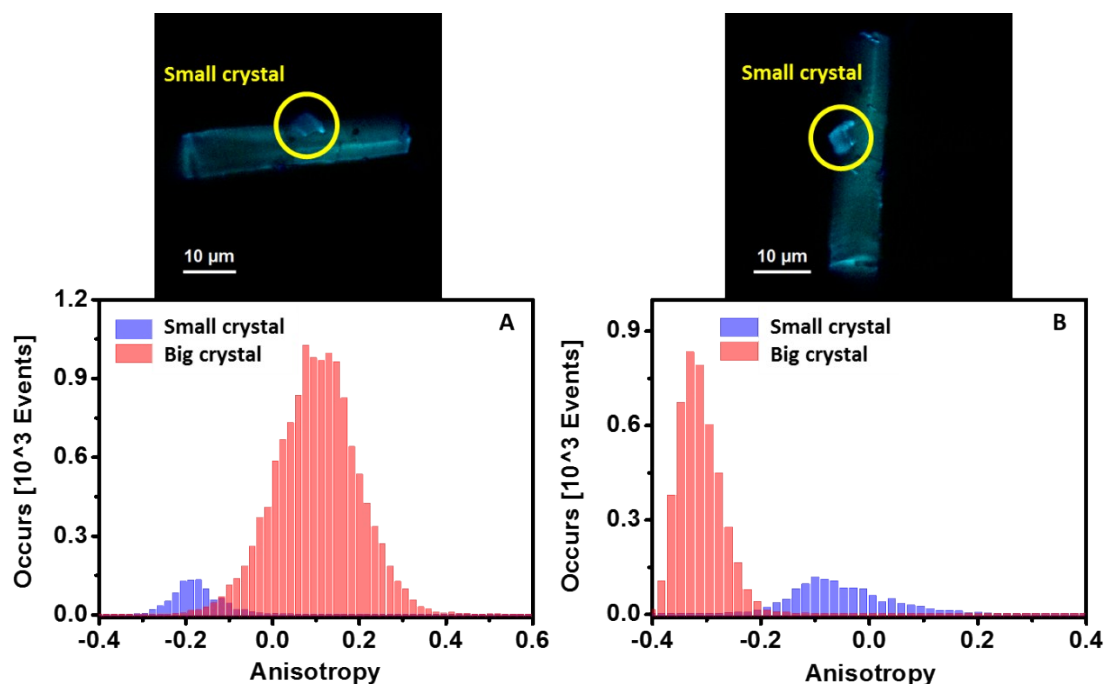

**Figure S9.** Histograms of the emission anisotropy for (A) 1 and (B) 2 positions of T12-apo crystal with respect to the plane of observation. The images show the 1 and 2 positions of the crystals. The excitation wavelength was 390 nm and the anisotropy was measured over the whole spectral range using a 430 nm long-pass filter.

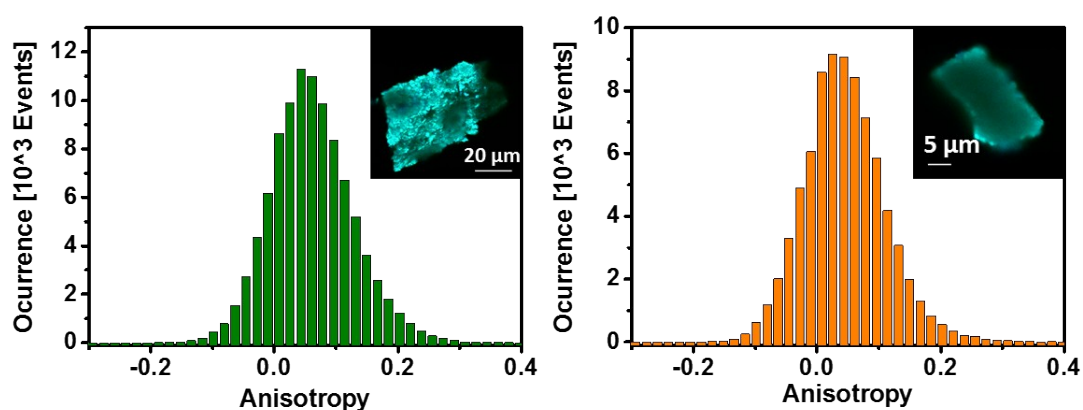

**Figure S10.** Histograms of the emission anisotropy value using two crystals of T12-Ester crystals. The excitation wavelength was 390 nm and the anisotropy was measured over the whole spectral range using a 430 nm long-pass filter. Insets: Images of the explored crystals.

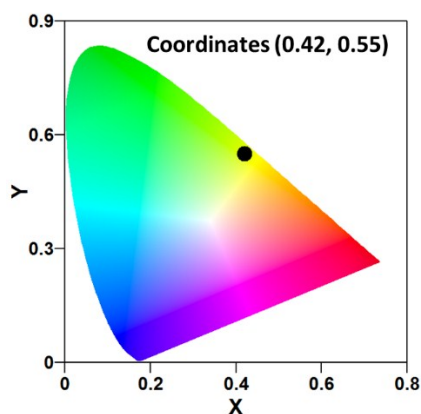

**Figure S11.** Commission International De l'Eclairage coordinates of T12-apo.

| Crystal in  | Orientation of the crystal | Distribution | Anisotropy Maximum | Contribution | FWHM |
|-------------|----------------------------|--------------|--------------------|--------------|------|
| Figure 6A   | 1                          | I            | 0.19               | 86           | 0.22 |
|             |                            | II           | -0.13              | 14           | 0.17 |
| Figure 6A'  | 2                          | I            | -0.32              | 85           | 0.12 |
|             |                            | II           | -0.05              | 15           | 0.30 |
| Figure 6B   | 1                          | I            | 0.26               | 81           | 0.16 |
|             |                            | II           | 0.13               | 19           | 0.13 |
| Figure 6B'  | 2                          | I            | -0.35              | 84           | 0.12 |
|             |                            | II           | -0.12              | 16           | 0.34 |
| Figure S8A  | 1                          | I            | 0.48               | 81           | 0.15 |
|             |                            | II           | 0.24               | 19           | 0.24 |
| Figure S8A' | 2                          | I            | -0.36              | 86           | 0.10 |
|             |                            | II           | -0.24              | 14           | 0.15 |
| Figure S8B  | 1                          | I            | 0.19               | 84           | 0.19 |
|             |                            | II           | -0.03              | 16           | 0.10 |
| Figure S8B' | 2                          | I            | -0.05              | 83           | 0.16 |
|             |                            | II           | -0.19              | 17           | 0.08 |
| Figure S8C  | 1                          | I            | 0.22               | 87           | 0.13 |
|             |                            | II           | 0.01               | 13           | 0.19 |
| Figure S8C' | 2                          | I            | -0.19              | 83           | 0.11 |
|             |                            | II           | 0.05               | 17           | 0.27 |

**Table S1.** Obtained values from the deconvolution of the histogram of the emission anisotropy for the 1 and 2 orientations of the crystals, shown in Figures 6 and S8. The excitation wavelength was 390 nm and the anisotropy was measured over the whole spectral range using a 430 nm long-pass filter.
